# Supplementary material for: Facile fabrication of cellulose-derived hard carbon for high-rate performance sodium-ion batteries by regulating degrees of polymerization
Source: Royal Society of Chemistry journal article supplement (doi:10.1039/d4gc05438e), 2025-01-01
Supplement: d4gc05438e1.pdf [file d4gc05438e1.pdf]

Supplementary Materials for  
**Facile fabrication of cellulose-derived hard carbon for  
high-rate performance sodium-ion batteries by  
regulating degrees of polymerization**

Fengyi Luo <sup>a</sup>, Conghua Yi <sup>a,\*</sup>, Dongjie Yang <sup>a,\*</sup>, Dezhe Fan <sup>a</sup>, Weifeng Liu <sup>a</sup>, Xueqing Qiu <sup>b</sup>, Wenli Zhang <sup>b</sup>

<sup>a</sup> School of Chemistry and Chemical Engineering, South China University of Technology, 381 Wushan Road, Tianhe District, Guangzhou, 510641, China.

<sup>b</sup> School of Chemical Engineering and Light Industry, Guangdong Provincial Key Laboratory of Plant Resources Biorefinery, Guangdong University of Technology, Waihuan Xi Road 100, Guangzhou, 510006, China.

**\*Corresponding Author**

E-mail:     [chy@scut.edu.cn](mailto:chy@scut.edu.cn)     (C.Y.);     [cedjyang@scut.edu.cn](mailto:cedjyang@scut.edu.cn)     (D.Y.)

## **Materials and general methods**

### **Synthesis of hard carbons and electrodes**

#### **1. Chemicals**

Bleached softwood pulp used as original fibers (FO) in this work was purchased from Canfor Corporation. Sodium Chlorite ( $\text{NaClO}_2$ ) is purchased from Macklin. Acetic Acid ( $\text{CH}_3\text{COOH}$ ) is purchased from Energy Chemical.  $\text{C}_4\text{H}_{18}\text{CuN}_4\text{O}_2$  is purchased from Shanghai Taixuan Industrial Co., Ltd.

#### **2. Materials synthesis**

First, two parts of 10 g cellulose are mixed with 160 mL deionized water in a sealed bag and placed in a 75 °C water bath, and 6 g  $\text{NaClO}_2$  and 3 mL  $\text{CH}_3\text{COOH}$  are added for reaction time of 3h and 4 h respectively . Cellulose with polymerization degrees of 600 and 300, respectively, and unreacted cellulose with polymerization degrees of 1200. When the cellulose is dried at 50 °C for 12h, the cellulose is named DP-x, where x indicates the degree of polymerization. Second, the obtained cellulose is pyrolyzed at 1400°C for 120 mins under Ar with ramping rate of 3°C min<sup>-1</sup>. The acquired HC is named as C1200, C600 and C300.

Determination method of fiber polymerization: The viscosity average polymerization degree ( $\text{DP}_v$ ) of bleached pulp is determined by copper ethylenediamine method. The appropriate amount of fiber raw material is completely dissolved in 0.5 mol/L copper ethylenediamine solution, and held in a constant temperature water bath at 25 °C for 30 min. After that, the outflow time of the solution is determined using the Nordic standard viscoseter, and the characteristic viscosity of the solution was calculated by Martin

formula  $[\eta]$ , and substituted into the following formula:  $DP_v^{0.905}=0.75[\eta]$ .

### 3. Material characterization

The crystallinity of cellulose is calculated by reported articles<sup>1,2</sup>. Thermogravimetric analysis (TGA) measurement is performed on a TA SDT Q600 analyzer from room temperature to 1400 °C at a rate of 10 °C min<sup>-1</sup> in Ar atmosphere. The structure of samples is measured by X-ray diffraction (XRD) with Cu K<sub>α</sub> radiation ( $\lambda = 1.5418 \text{ \AA}$ ), voltage of 36 kV, current of 20 mA and a scan speed of 10° min<sup>-1</sup>.  $L_a$  and  $L_c$  are calculated from Scherrer equation:

$$La\&Lc = \frac{\kappa\lambda}{\beta\cos\theta}$$

In this formula,  $\kappa$  is scherrer constant ( $\kappa$  is 0.9 for  $L_c$  and  $\kappa$  is 1.84 for  $L_a$ ),  $\lambda$  is the radiation wavelength,  $\beta$  is the half-height width of the (002) peak,  $\theta$  is the reflection angle of (002) or (100).

Raman spectra are conducted by HORIBA Scientific LabRAM HR Evolution with a laser wavelength of 532 nm.  $L_{a, \text{Raman}}$  is calculated from the equation:

$$La, Raman = (2.4 \times 10^{-10})\lambda^{-4}(I_{D1}/I_G)$$

Where  $\lambda$  is the laser wavelength. Scanning electron microscope (SEM) is conducted by a Regulus8100 field-emission scanning electron microscopy. High resolution transmission electron microscope (HRTEM) is conducted by JEM 2100F. Fourier transformed infrared (FT-IR) is operated on a Nicolet IS50 - Nicolet Continuum infrared spectrometer (Thermo Fisher Scientific). X-ray photoelectron spectroscopy (XPS) analysis is measured by Thermo Kalpha. N<sub>2</sub> and CO<sub>2</sub> adsorption-desorption experiments are performed with Mike ASAP2460. Small angle X-ray scattering

(SAXS) is tested by Xeuss 2.0 (Xenocs, France), sample test distance: 150 mm and the data of SAXS is fitted according to previous work<sup>3</sup>. True density test is tested by an AccuPyc II 1345 analyzer using Helium. The volume of closed pores was calculated based on the work by Hu et al<sup>4</sup>. Electron paramagnetic resonance (EPR) is carried out by Bruker ELEXSYS-II E500 CW-EPR, operating at a frequency of 9.83 GHz.

#### **4. Electrochemical Measurements**

A slurry of 80wt% HC, 10wt% Super-P, and 10wt% PVDF is coated onto a carbon coated Cu foil current collector followed by drying in a vacuum oven at 110°C for 10 h to remove water totally. The average mass of active materials coated on the carbon coated Cu foil is about 1.2-1.5 mg cm<sup>-2</sup>. The CR2032-type coin cells are assembled in glove box (H<sub>2</sub>O, O<sub>2</sub> < 0.1 ppm) using 1 M NaPF<sub>6</sub> in diglyme (DME), GF/C glass microfiber filter (Whatman) and metallic Na counter electrode. Galvanostatic charge-discharge (GCD) tests and Galvanostatic intermittent titration technique (GITT) are conducted by LAND 2001A battery test system in the voltage range of 0.001–3 V (vs Na<sup>+</sup>/Na) at approximately 25°C. The GITT is tested using a pulse current of 50 mA g<sup>-1</sup> for 10 mins accompanied with a rest interval of 2.0 h. The apparent diffusion coefficients of Na<sup>+</sup> ions are calculated based on the Fick's second law<sup>5</sup>. Cyclic voltammetry (CV) tests are conducted via Bio-Logic VSP electrochemical workstation with the potential range from 0.001 to 3 V (vs Na<sup>+</sup>/Na) and the scanning rate from 0.1 to 1 mV s<sup>-1</sup>. Electrochemical impedance spectroscopy (EIS, frequency ranges: 100 kHz–0.01 Hz, amplitude: 5 mV) are performed by Bio-Logic VSP. The full cell consists of C600 as the anode and Na<sub>3</sub>V<sub>2</sub>(PO<sub>4</sub>)<sub>3</sub> as the cathode, and the N/P is 1.1.

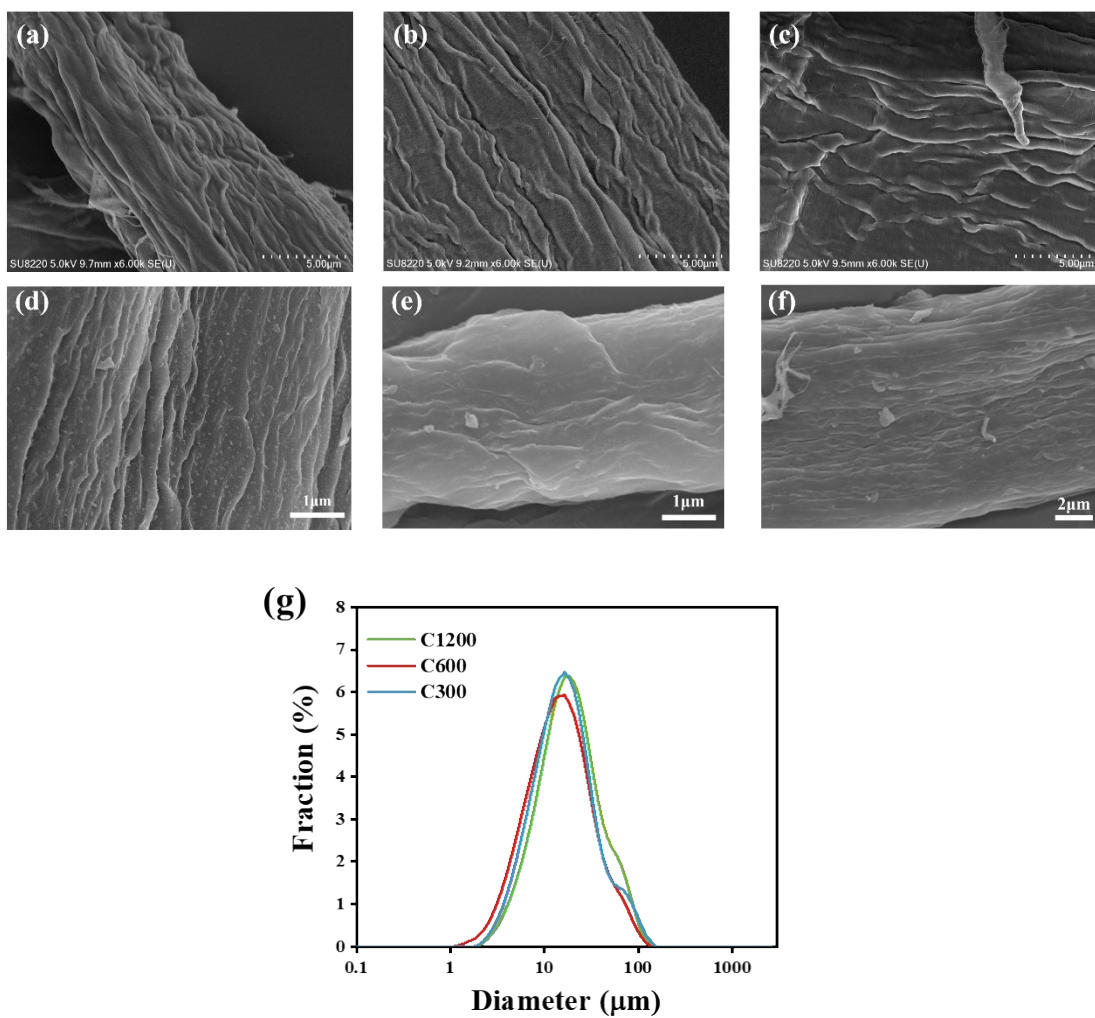

**Figure S1.** SEM images of the (a)DP-1200, (b) DP-600, (c)DP-300, (d) C1200, (e) C600, (f) C300 samples and (g) particle size distribution.

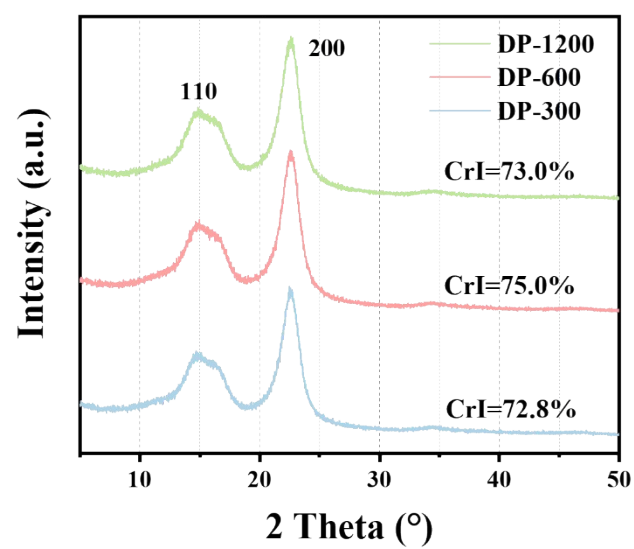

**Figure S2.** XRD pattern of the cellulose.

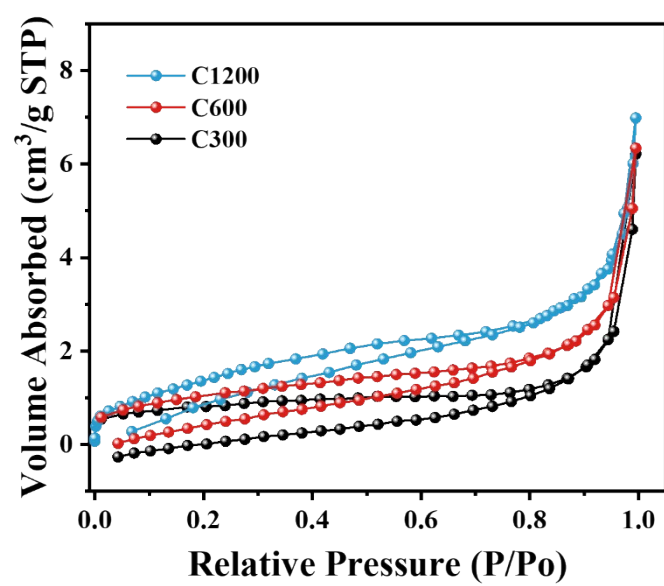

**Figure S3.** N<sub>2</sub> adsorption–desorption isotherms of as-prepared hard carbon materials.

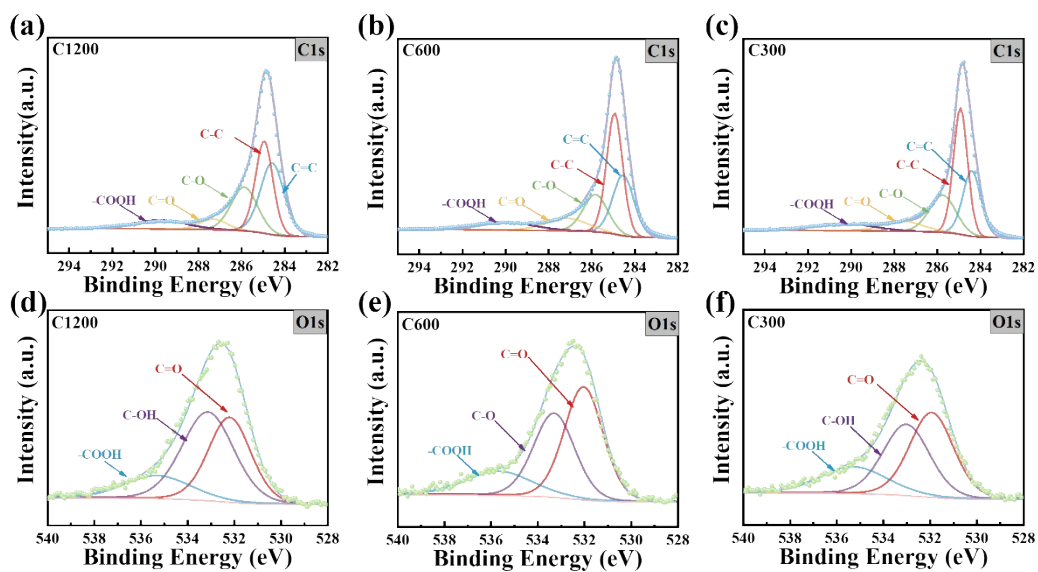

Figure S4. (a-c) XPS C1s and (d-f) O1s spectra and fitted curves of C1200, C600 and C300 samples.



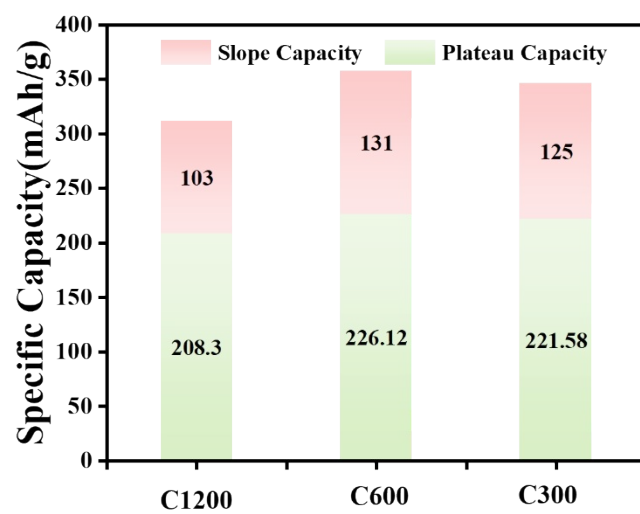

**Figure S5.** Capacity ratios of the slope region and plateau region in the second cycle discharge curve.

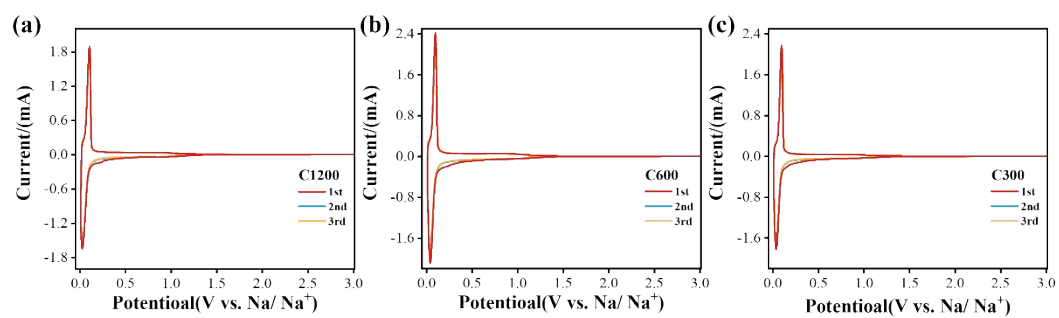

**Figure S6.** CV curves under  $0.1 \text{ mV s}^{-1}$  for (a) C1200, (b) C600 and (c) C300 anodes.

**Table S1.** Physical parameters of different hard carbons from the XRD spectra and Raman spectra.

|                 |                                | <b>C1200</b> |       |       |       | <b>C600</b> |       |       |       | <b>C300</b> |  |
|-----------------|--------------------------------|--------------|-------|-------|-------|-------------|-------|-------|-------|-------------|--|
| <b>Area (%)</b> | <b>High disordered</b>         | 29.49        |       |       |       | 36.28       |       |       |       | 30.29       |  |
|                 | <b>Pseudo-graphitic</b>        | 41.77        |       |       |       | 46.54       |       |       |       | 45.42       |  |
|                 | <b>Graphite-like</b>           | 28.74        |       |       |       | 17.18       |       |       |       | 24.29       |  |
|                 | <b>2<math>\theta</math>(°)</b> | 20.29        | 23.28 | 26.46 | 20.62 | 23.45       | 26.31 | 20.12 | 23.52 | 26.55       |  |
|                 | <b>d<sub>002</sub>(nm)</b>     | 0.372        |       |       |       | 0.384       |       |       |       | 0.377       |  |
|                 | <b>L<sub>c</sub> (nm)</b>      | 0.998        |       |       |       | 1.271       |       |       |       | 1.022       |  |
|                 | <b>AD1/AG</b>                  | 1.406        |       |       |       | 1.608       |       |       |       | 1.431       |  |
|                 | <b>AD3/AG</b>                  | 0.574        |       |       |       | 1.452       |       |       |       | 1.401       |  |
|                 | <b>La</b>                      | 13.68        |       |       |       | 11.96       |       |       |       | 13.43       |  |

**Table S2.** Pore structure parameters of hard carbon materials.

| Samples | Specific surface area(m <sup>2</sup> /g) | Specific surface area(m <sup>2</sup> /g)(CO <sub>2</sub> ) | V <sub>Total</sub> (cm <sup>3</sup> /g) | V <sub>Total</sub> (cm <sup>3</sup> /g) (CO <sub>2</sub> ) | R <sub>micro</sub> (%) | R <sub>Meso</sub> (%) | Average pore radius(Å) | Close pore Volume(cm <sup>3</sup> /g) |
|---------|------------------------------------------|------------------------------------------------------------|-----------------------------------------|------------------------------------------------------------|------------------------|-----------------------|------------------------|---------------------------------------|
| C1200   | 5.61                                     | 36.45                                                      | 0.0066                                  | 0.00086                                                    | 8.60                   | 91.40                 | 10.91                  | 0.004                                 |
| C600    | 3.83                                     | 21.48                                                      | 0.0026                                  | 0.00059                                                    | 19.12                  | 80.88                 | 8.44                   | 0.046                                 |
| C300    | 2.97                                     | 15.21                                                      | 0.0033                                  | 0.00019                                                    | 19.95                  | 80.05                 | 8.76                   | 0.012                                 |

**Table S3.** Percentage of the component after peak splitting fitting from XPS spectrum.

| Samples | C     | O    | Percentage of the component after peak splitting fitting (at%) |                    |       |       |       |
|---------|-------|------|----------------------------------------------------------------|--------------------|-------|-------|-------|
|         |       |      | C1s                                                            |                    | O1s   |       |       |
|         |       |      | sp <sup>2</sup> -C                                             | sp <sup>3</sup> -C | C=O   | C-O   | -COOH |
| C1200   | 92.94 | 7.06 | 32.46                                                          | 30.84              | 37.29 | 47.39 | 15.32 |
| C600    | 93.15 | 6.85 | 25.28                                                          | 38.08              | 46.57 | 36.64 | 16.80 |
| C300    | 90.83 | 9.17 | 24.63                                                          | 37.36              | 42.26 | 37.73 | 20.01 |

## Reference

1. S. Park, J. O. Baker, M. E. Himmel, P. A. Parilla and D. K. Johnson, *Biotechnology for Biofuels*, 2010, **3**, 10.
2. J. Zhang, Y. Wang, L. Zhang, R. Zhang, G. Liu and G. Cheng, *Bioresource Technology*, 2014, **151**, 402-405.
3. D. Saurel, J. Segalini, M. Jauregui, A. Pendashteh, B. Daffos, P. Simon and M. Casas-Cabanas, *Energy Storage Materials*, 2019, **21**, 162-173.
4. Y. Li, Y. Lu, Q. Meng, A. C. S. Jensen, Q. Zhang, Q. Zhang, Y. Tong, Y. Qi, L. Gu, M.-M. Titirici and Y.-S. Hu, *Advanced Energy Materials*, 2019, **9**, 1902852.
5. Y. Li, Y.-S. Hu, M.-M. Titirici, L. Chen and X. Huang, *Advanced Energy Materials*, 2016, **6**, 1600659.
